# Supplementary material for: Light-Driven CO2 Reduction by Co-Cytochrome b 562
Source: PubMed Central journal article supplement (PMC8082397; doi:10.3389/fmolb.2021.609654), 2021-04-15
Supplement: datasheet1.pdf [file datasheet1.pdf]

## Supplementary Information

### Light-driven CO<sub>2</sub> reduction by Co-Cytochrome *b<sub>562</sub>*

Rafael Alcala-Torano<sup>1</sup>, Nicholas Halloran<sup>1</sup>, Noah Gwerder<sup>1</sup>, Dayn J. Sommer<sup>1</sup>, Giovanna Ghirlanda<sup>1\*</sup>

<sup>1</sup>School of Molecular Sciences, Arizona State University, Tempe, AZ,

**\* Correspondence:**

Giovanna Ghirlanda

Giovanna.Ghirlanda@asu.edu

## 1. Derivation of fitting equation for the titration data

Since the Soret peaks of CoPPIX and holo protein overlap with each other, the absorbance  $A$  at the Soret wavelength of the holo construct ( $\sim 425$  nm) can be expressed as:

$$A = \varepsilon_{CoPPIX}[CoPPIX] + \varepsilon_{CoCyt}[CoCyt] \quad (S1)$$

where  $\varepsilon_i$  is the extinction coefficient of species  $i$  at this wavelength,  $[X]$  is the molar concentration of species  $X$ , and CoCyt indicates holo protein. When no protein has been added, equation S1 becomes:

$$A_0 = \varepsilon_{CoPPIX}[CoPPIX]_T \quad (S2)$$

where  $A_0$  indicates the initial absorbance of free CoPPIX at the Soret band of the holo protein ( $\sim 425$  nm), and  $[CoPPIX]_T$  corresponds to the total CoPPIX concentration. Subtracting equation S2 from equation S1 and simplifying we obtain:

$$A - A_0 = \varepsilon_{CoPPIX}([CoPPIX] - [CoPPIX]_T) + \varepsilon_{CoCyt}[CoCyt] \quad (S3)$$

Further, for the dissociation equilibrium of CoCyt shown below, we can write the mass balance equation for CoPPIX as equation S4:

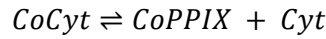

$$[CoPPIX]_T = [CoPPIX] + [CoCyt] \quad (S4)$$

By substituting the value of  $[CoPPIX]_T$  from equation S4 into equation S3, we can simplify as:

$$\Delta A = \Delta\varepsilon[CoCyt] \quad (S5)$$

Where  $\Delta A = A - A_0$  and  $\Delta\varepsilon = \varepsilon_{CoCyt} - \varepsilon_{CoPPIX}$ . The  $K_d$  expression for the dissociation of CoCyt is given by equation S6, and the mass balance equation for protein is shown in equation S7:

$$K_d = \frac{[CoPPIX][Cyt]}{[CoCyt]} \quad (S6)$$

$$[Cyt]_T = [Cyt] + [CoCyt] \quad (S7)$$

Making use of mass balance equations S4 and S7, equation S6 becomes:

$$K_d = \frac{([CoPPIX]_T - [CoCyt])([Cyt]_T - [CoCyt])}{[CoCyt]} \quad (S8)$$

Simplifying this equation and factoring  $[CoCyt]$ , we get:

$$[CoCyt]^2 - ([Cyt]_T + [CoPPIX]_T + K_d)[CoCyt] + [CoPPIX]_T[Cyt]_T = 0 \quad (S9)$$

Using the quadratic formula, we can solve for  $[CoCyt]$  as:

$$[CoCyt] = \frac{1}{2} \left( [Cyt]_T + [CoPPIX]_T + K_d \pm \sqrt{([Cyt]_T + [CoPPIX]_T + K_d)^2 - 4[CoPPIX]_T[Cyt]_T} \right) \quad (S10)$$

Given that [CoCyt] cannot be larger than [CoPPIX]<sub>T</sub>, the only valid solution is that with the negative radical:

$$[CoCyt] = \frac{1}{2} \left( [Cyt]_T + [CoPPIX]_T + K_d - \sqrt{([Cyt]_T + [CoPPIX]_T + K_d)^2 - 4[CoPPIX]_T[Cyt]_T} \right) \quad (S10)$$

Finally, substituting the value of [CoCyt] from equation S5 and solving for ΔA we obtain the desired equation:

$$\Delta A = \frac{\Delta \varepsilon}{2} \left( [Cyt]_T + [CoPPIX]_T + K_d - \sqrt{([Cyt]_T + [CoPPIX]_T + K_d)^2 - 4[CoPPIX]_T[Cyt]_T} \right) \quad (1)$$

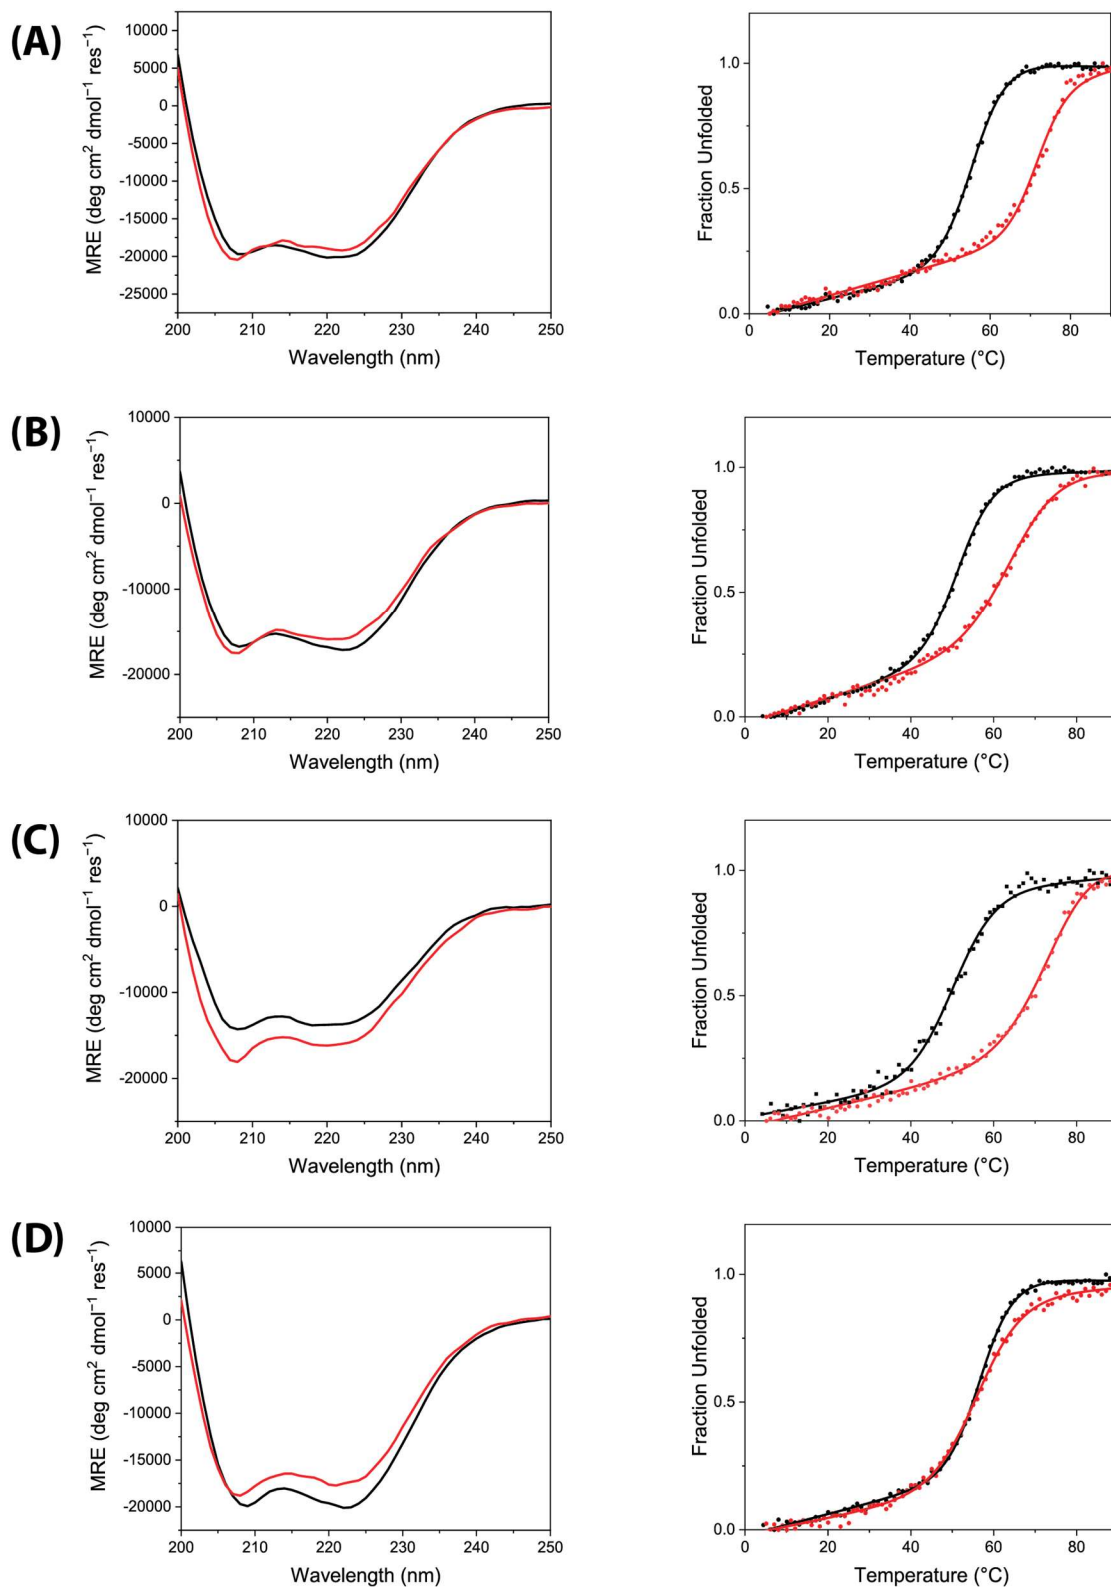

**Figure S1.** CD spectra (left) and thermal denaturation curves (right) of apo (black) and holo (red) cobalt cytochrome  $b_{562}$  (A) WT, (B) M7A, (C) M7H, and (D) H102A.

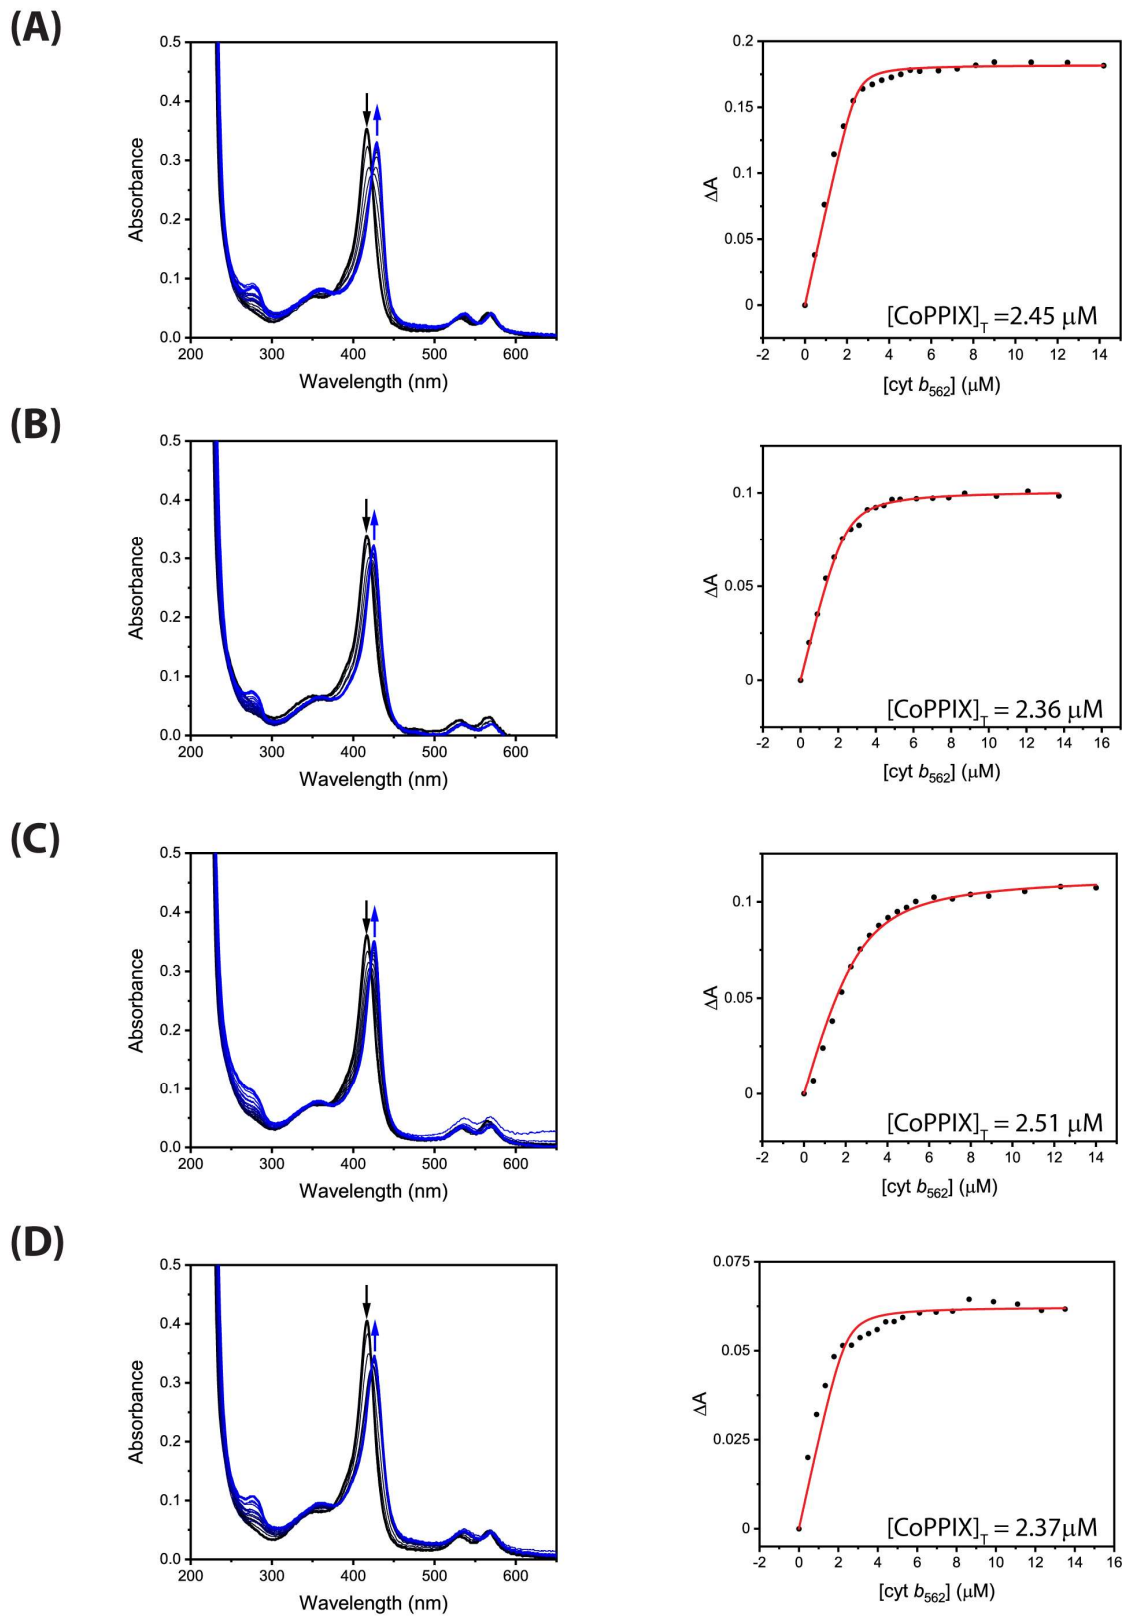

**Figure S2.** UV-Vis traces (left) and fitted binding isotherms (right) for the titration of free CoPPiX (initial black trace) with cyt  $b_{562}$  (A) WT, (B) M7A, (C) M7H, and (D) H102A in 200 mM potassium phosphate pH 7.5. The blue trace indicates the endpoint of the titration. The arrows indicate the changes occurring upon addition of titrant.

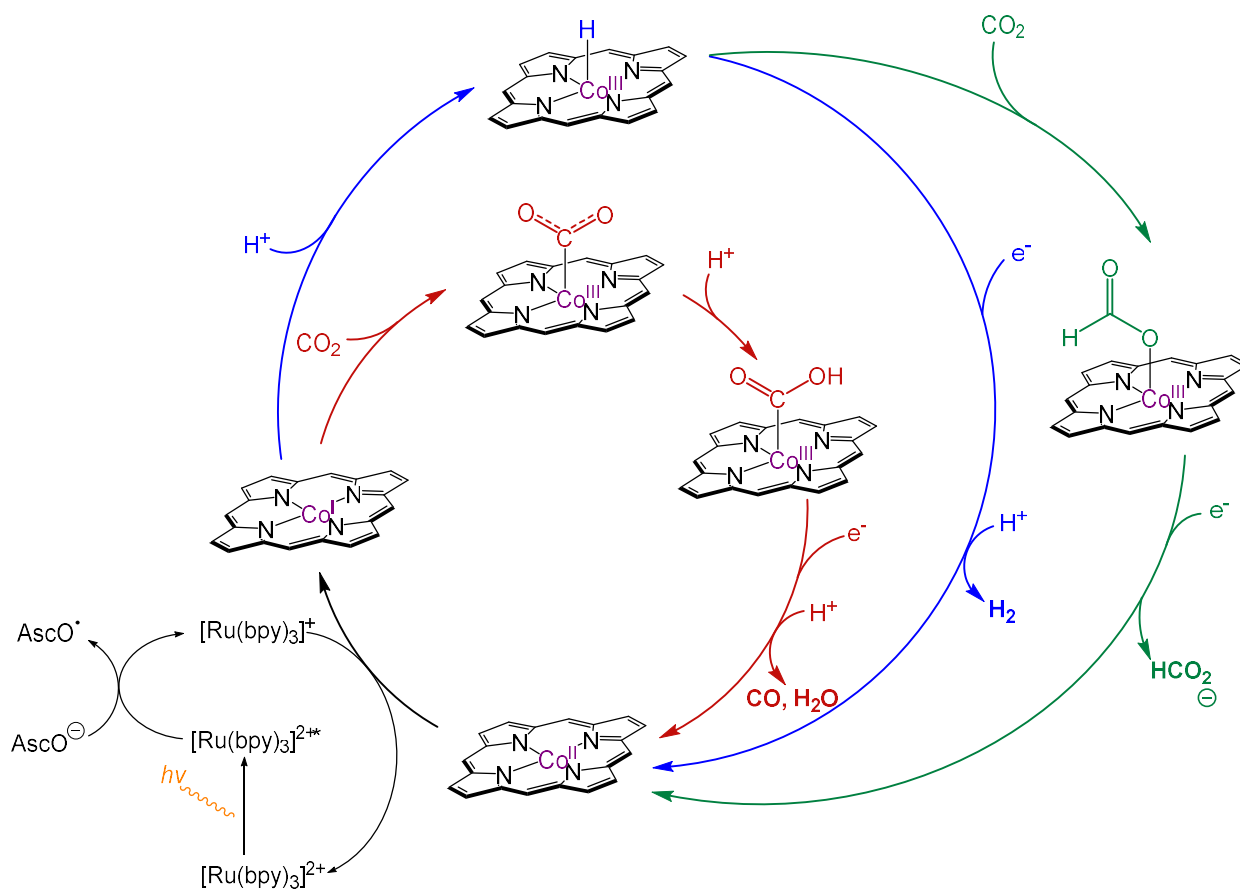

**Figure S3.** Catalytic cycles for the generation of H<sub>2</sub> (blue), CO (red), and HCO<sub>2</sub><sup>-</sup> (green) by cobalt porphyrins through photoirradiation in the presence of [Ru(bpy)<sub>3</sub>]<sup>2+</sup> and ascorbate (Asc<sup>-</sup>) as sacrificial electron donor.

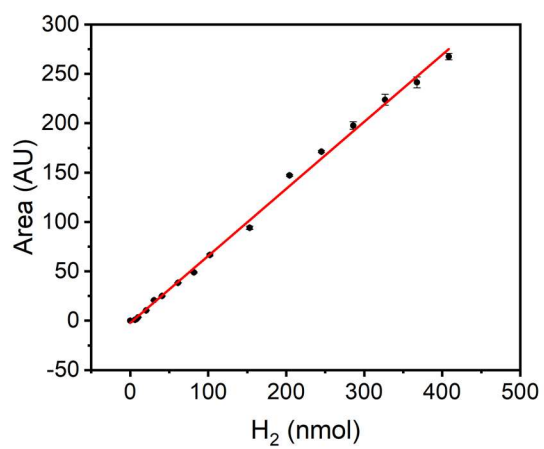

**Figure S4.** Calibration curve for H<sub>2</sub>. The data was fitted to the linear equation  $y = 0.679x - 2.27$ , with an adjusted  $R^2 = 0.9970$ .

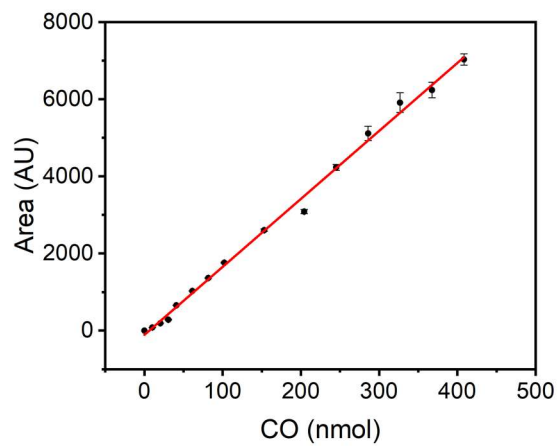

**Figure S5.** Calibration curve for CO. The data was fitted to the linear equation  $y = 17.62x - 107.97$ , with an adjusted  $R^2 = 0.9958$ .



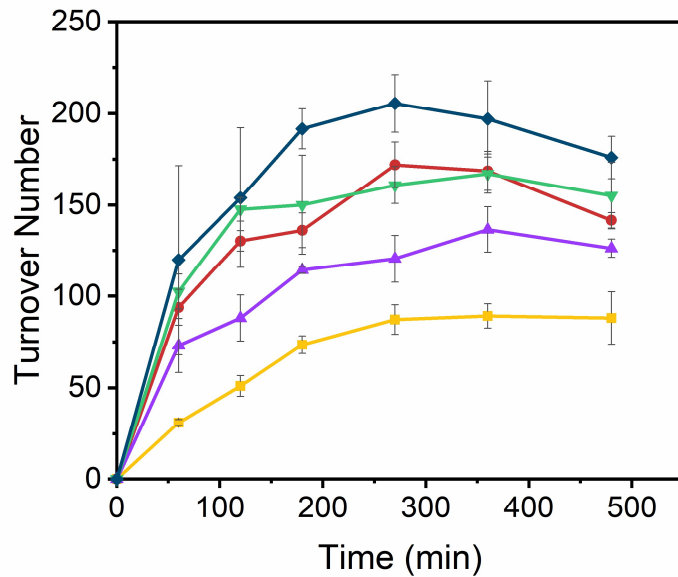

**Figure S6.** Produced H<sub>2</sub> and over time from the photoinduced reduction of protons by CoPPIX and Co-cyt *b*<sub>562</sub> mutants at pH 6.0 under argon. The experiments were carried out in 100 mM ascorbic acid, 1 mM [Ru(bpy)<sub>3</sub>]<sup>2+</sup>, 200 mM potassium phosphate, and 20 μM catalyst under white LED light irradiation. Colors represent free CoPPIX (yellow squares), WT (red circles), M7A (purple up triangles), M7H (green down triangles), and H102A (dark blue diamonds). The experiments were carried out in triplicate. The error bars represent the standard deviation of the sample.

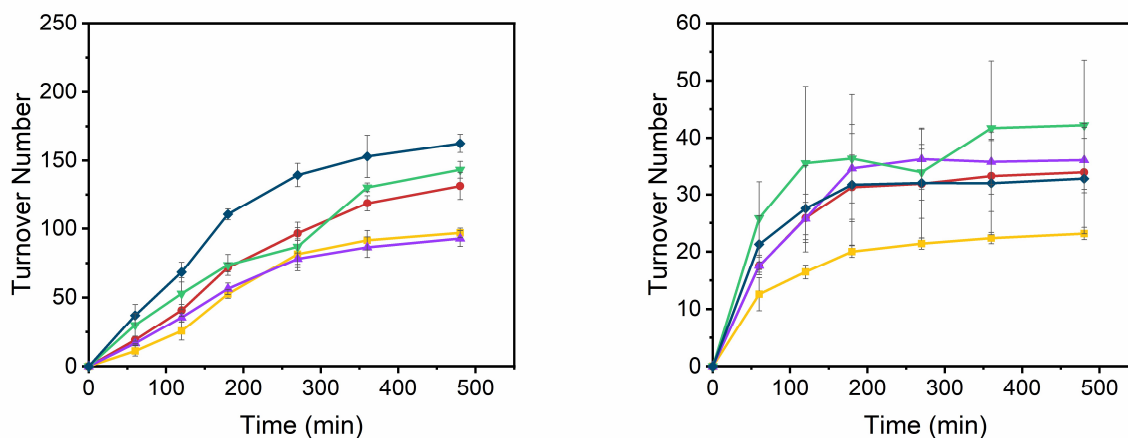

**Figure S7.** Produced H<sub>2</sub> (left) and CO (right) and over time from the photoinduced reduction of protons by CoPPIX and Co-cyt *b*<sub>562</sub> mutants at pH 7.0 under 1 atm CO<sub>2</sub>. The experiments were carried out in 100 mM ascorbic acid, 1 mM [Ru(bpy)<sub>3</sub>]<sup>2+</sup>, 200 mM potassium phosphate, 20 μM CoPPIX, and 30 μM apo cyt *b*<sub>562</sub> (except for CoPPIX) under white LED light irradiation. Colors represent free CoPPIX (yellow squares), WT (red circles), M7A (purple up triangles), M7H (green down triangles), and H102A (dark blue diamonds). Experiments were carried out in triplicate. The error bars represent the standard deviation of the sample.

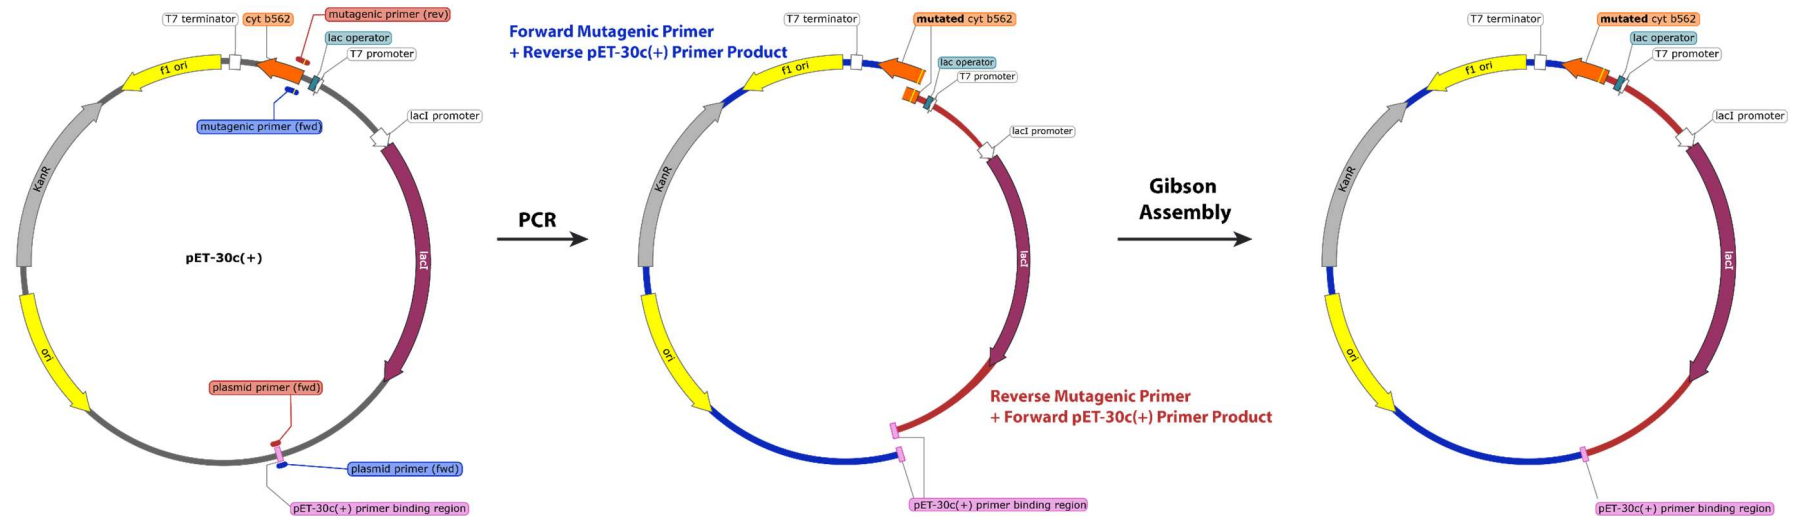

**Figure S8.** Scheme illustrating the generation of mutants in a pET30c(+) vector encoding WT *cyt b<sub>562</sub>* via Gibson Assembly. The region encoding for *cyt b<sub>562</sub>* is shown as an orange feature on the plasmid map, and an auxiliary plasmid primer binding region is shown in purple. Primers are depicted as blue or red lines offset from the plasmid map. A yellow line indicates the desired mutation. For each mutant, two PCR reactions were carried out. The first product consists in the PCR reaction using the forward mutagenic primer and the reverse pET-30c(+) primer (blue product), and the second PCR product using the opposite combination (red product). The PCR products were purified by gel electrophoresis, and the circular vector was then obtained by mixing both fragments in presence of the Gibson Assembly Master Mix (NEB) according to the manufacturer's recommendations.

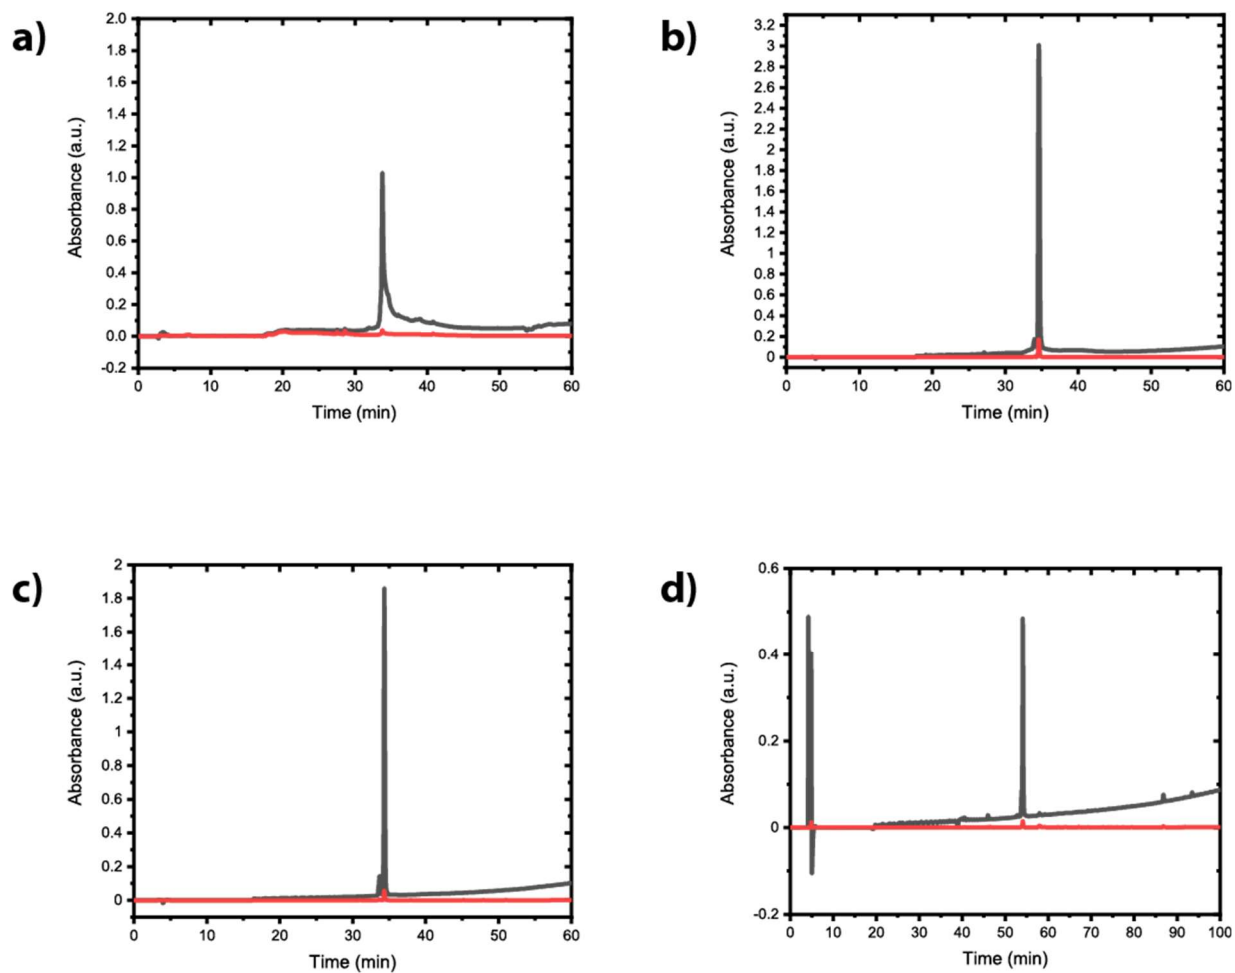

**Figure S9.** Analytical HPLC traces of apo cytochrome  $b_{562}$  constructs monitored by UV-Vis at 220 nm (black traces) and 280 nm (red traces). a) WT, b) M7A, c) M7H, d) H102A.

**Table S1.** Primers used for generation of mutants by PCR. All primers are shown in a 5' to 3' direction (left to right).

| <b>Mutant</b> | <b>Forward</b>           | <b>Reverse</b>            |
|---------------|--------------------------|---------------------------|
| pET30c(+)     | CGATGCAGATCCGGAACATAATG  | CATTATGTTCCGGATCTGCATCG   |
| M7A           | GAAGACAACGCGGAAACCCTG    | CAGGGTTCCGCGTTGTCTTC      |
| M7H           | GAAGACAACCACGAAACCCTG    | CAGGGTTTCGTGGTTGTCTTC     |
| H102A         | GAAATGCTTACGCGCAGAAGTATC | GATACTTCTGCGCGTAAGCATTTTC |

**Table S2.** Calculated  $p$ -values for each comparison between mutants at each examined condition. The null hypothesis for each test was  $H_0: \bar{x}_1 - \bar{x}_2 = 0$ . Values corresponding to  $p > 0.05$  (the null hypothesis holds) are highlighted.

|                                       | CoPPIX               | WT                   | M7A                  | M7H                  | H102A                |
|---------------------------------------|----------------------|----------------------|----------------------|----------------------|----------------------|
| <b>pH 6.0 under Ar</b>                |                      |                      |                      |                      |                      |
| <i>Hydrogen gas</i>                   |                      |                      |                      |                      |                      |
| CoPPIX                                |                      | $5.2 \times 10^{-4}$ | $4.5 \times 10^{-3}$ | $4.3 \times 10^{-5}$ | $2.9 \times 10^{-4}$ |
| WT                                    |                      |                      | 0.025                | 0.64                 | 0.044                |
| M7A                                   |                      |                      |                      | 0.032                | $4.0 \times 10^{-3}$ |
| M7H                                   |                      |                      |                      |                      | 0.025                |
| <b>pH 6.0 under CO<sub>2</sub></b>    |                      |                      |                      |                      |                      |
| <i>Hydrogen gas</i>                   |                      |                      |                      |                      |                      |
| [Ru(bpy) <sub>3</sub> ] <sup>2+</sup> | $1.9 \times 10^{-5}$ | $9.7 \times 10^{-6}$ | $4.1 \times 10^{-6}$ | $1.4 \times 10^{-5}$ | $1.1 \times 10^{-6}$ |
| CoPPIX                                |                      | $2.4 \times 10^{-4}$ | $3.2 \times 10^{-3}$ | $1.0 \times 10^{-3}$ | $1.1 \times 10^{-5}$ |
| WT                                    |                      |                      | $6.2 \times 10^{-4}$ | 0.017                | $2.3 \times 10^{-3}$ |
| M7A                                   |                      |                      |                      | $6.4 \times 10^{-3}$ | $1.4 \times 10^{-5}$ |
| M7H                                   |                      |                      |                      |                      | $2.6 \times 10^{-4}$ |
| <i>Carbon monoxide</i>                |                      |                      |                      |                      |                      |
| CoPPIX                                |                      | 0.048                | $3.9 \times 10^{-3}$ | 0.035                | 0.082                |
| WT                                    |                      |                      | 0.49                 | 0.46                 | 0.73                 |
| M7A                                   |                      |                      |                      | 0.16                 | 0.40                 |
| M7H                                   |                      |                      |                      |                      | 0.79                 |
| <i>Formate</i>                        |                      |                      |                      |                      |                      |
| CoPPIX                                |                      | 0.88                 | $9.8 \times 10^{-3}$ | 0.30                 | 0.52                 |
| WT                                    |                      |                      | $8.9 \times 10^{-3}$ | 0.34                 | 0.57                 |
| M7A                                   |                      |                      |                      | $9.5 \times 10^{-3}$ | 0.028                |
| M7H                                   |                      |                      |                      |                      | 0.83                 |
| <b>pH 7.0 under CO<sub>2</sub></b>    |                      |                      |                      |                      |                      |
| <i>Hydrogen gas</i>                   |                      |                      |                      |                      |                      |
| CoPPIX                                |                      | $2.4 \times 10^{-4}$ | $3.2 \times 10^{-3}$ | $1.0 \times 10^{-3}$ | $1.1 \times 10^{-5}$ |
| WT                                    |                      |                      | $6.2 \times 10^{-4}$ | 0.017                | $6.1 \times 10^{-3}$ |
| M7A                                   |                      |                      |                      | $6.4 \times 10^{-3}$ | $1.4 \times 10^{-5}$ |
| M7H                                   |                      |                      |                      |                      | $2.6 \times 10^{-4}$ |
| <i>Carbon monoxide</i>                |                      |                      |                      |                      |                      |
| CoPPIX                                |                      | 0.037                | 0.019                | 0.099                | 0.23                 |
| WT                                    |                      |                      | 0.68                 | 0.33                 | 0.87                 |

|                | <b>CoPPIX</b> | <b>WT</b> | <b>M7A</b> | <b>M7H</b> | <b>H102A</b> |
|----------------|---------------|-----------|------------|------------|--------------|
| M7A            |               |           |            | 0.45       | 0.64         |
| M7H            |               |           |            |            | 0.34         |
| <i>Formate</i> |               |           |            |            |              |
| CoPPIX         |               | 0.25      | 0.50       | 0.084      | 0.46         |
| WT             |               |           | 0.50       | 0.15       | 0.54         |
| M7A            |               |           |            | 0.071      | 0.94         |
| M7H            |               |           |            |            | 0.076        |

**Table S3.** Calculated  $p$ -values for each comparison between conditions for each evaluated mutant. Condition A: pH 6.0 under Ar; condition B: pH 6.0 under CO<sub>2</sub>; condition C: pH 7.0 under CO<sub>2</sub>. The null hypothesis for each test was  $H_0: \bar{x}_1 - \bar{x}_2 = 0$ . Values corresponding to  $p > 0.05$  (the null hypothesis holds) are highlighted.

| Mutant | Hydrogen gas |                      |                      | Carbon<br>monoxide   | Formate              |
|--------|--------------|----------------------|----------------------|----------------------|----------------------|
|        | A vs B       | A vs C               | B vs C               | B vs C               | B vs C               |
| CoPPIX | 0.040        | 0.43                 | 0.14                 | $5.3 \times 10^{-3}$ | $7.0 \times 10^{-3}$ |
| WT     | 0.60         | 0.011                | $4.1 \times 10^{-3}$ | 0.91                 | 0.78                 |
| M7A    | 0.16         | $5.4 \times 10^{-3}$ | $1.1 \times 10^{-3}$ | 0.29                 | 0.24                 |
| M7H    | 0.086        | 0.028                | 0.34                 | 0.69                 | 0.80                 |
| H102A  | 0.20         | 0.012                | $3.6 \times 10^{-4}$ | 0.63                 | 0.072                |



**Table S4.** Calculated  $p$ -values for the comparison between the estimated  $K_d$  values (in nM). The null hypothesis for each test was  $H_0: K_{d,1} - K_{d,2} = 0$ . Values corresponding to  $p > 0.05$  (the null hypothesis holds) are highlighted.

|            | <b>M7A</b>            | <b>M7H</b>            | <b>H102A</b>          |
|------------|-----------------------|-----------------------|-----------------------|
| <b>WT</b>  | $9.0 \times 10^{-22}$ | $2.3 \times 10^{-25}$ | $7.7 \times 10^{-3}$  |
| <b>M7A</b> |                       | $8.7 \times 10^{-21}$ | $1.3 \times 10^{-8}$  |
| <b>M7H</b> |                       |                       | $3.6 \times 10^{-22}$ |
